# Supplementary material for: Mash Screen: high-throughput sequence containment estimation for genome discovery
Source: PubMed Central journal article supplement (PMC6833257; doi:10.1186/s13059-019-1841-x), 2019-11-05

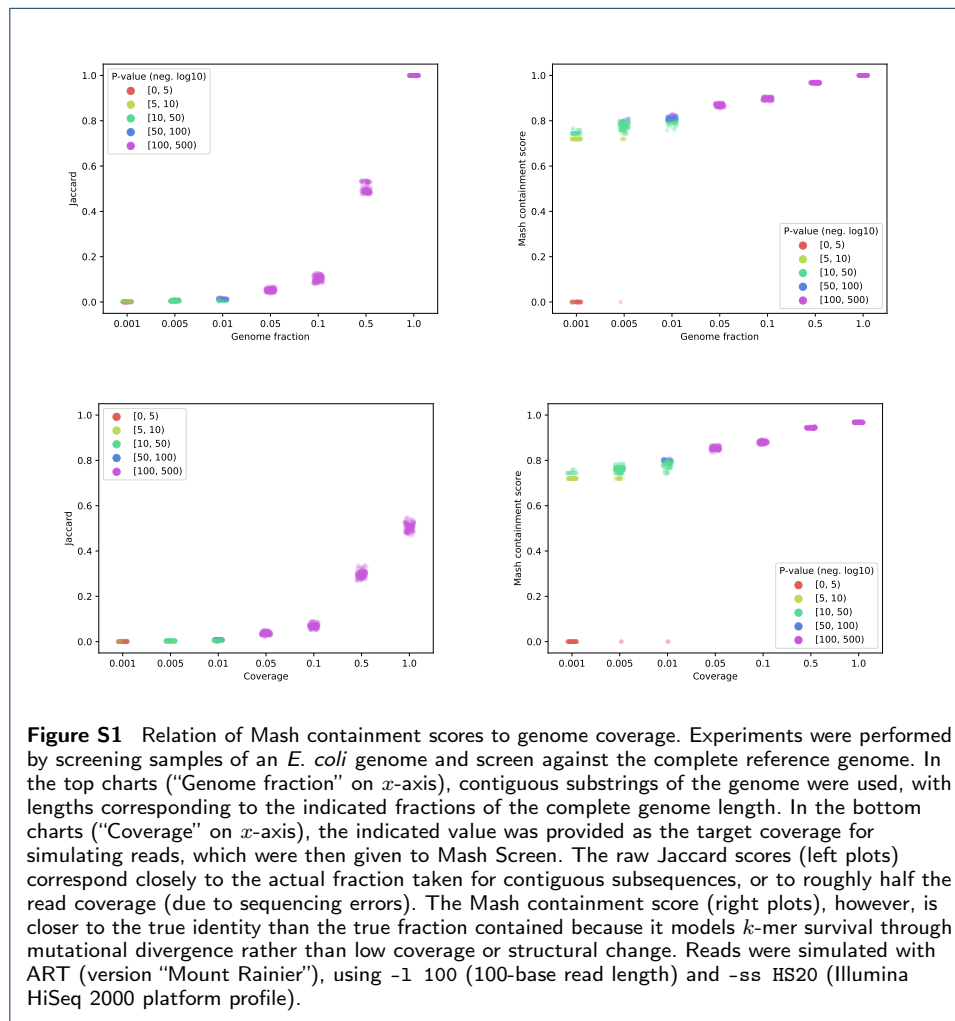

Supplement: 13059_2019_1841_MOESM1_ESM.pdf [file 13059_2019_1841_MOESM1_ESM.pdf]
